# Supplementary material for: Integrative analysis of h-prune as a potential therapeutic target for hepatocellular carcinoma
Source: PubMed Central journal article supplement — eBioMedicine. 2019 Jan 18;41:310–9. doi: 10.1016/j.ebiom.2019.01.001 (PMC6444224; doi:10.1016/j.ebiom.2019.01.001), 2019-01-18
Supplement: mmc1.pdf [file mmc1.pdf]

### Overall Survival

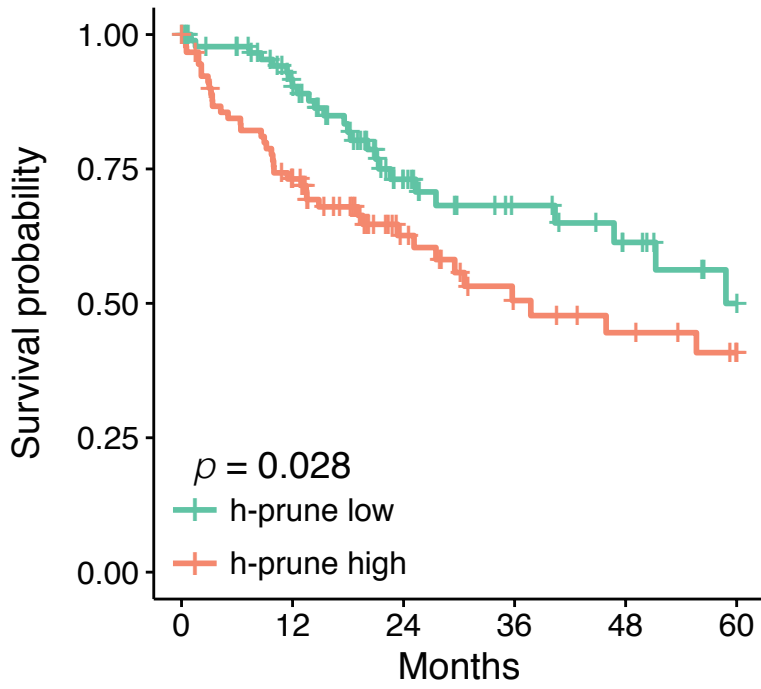

### Number at risk

| Strata       | 0  | 12 | 24 | 36 | 48 | 60 |
|--------------|----|----|----|----|----|----|
| h-prune low  | 93 | 70 | 34 | 22 | 15 | 8  |
| h-prune high | 93 | 61 | 29 | 18 | 14 | 9  |

Months

### Disease-free survival

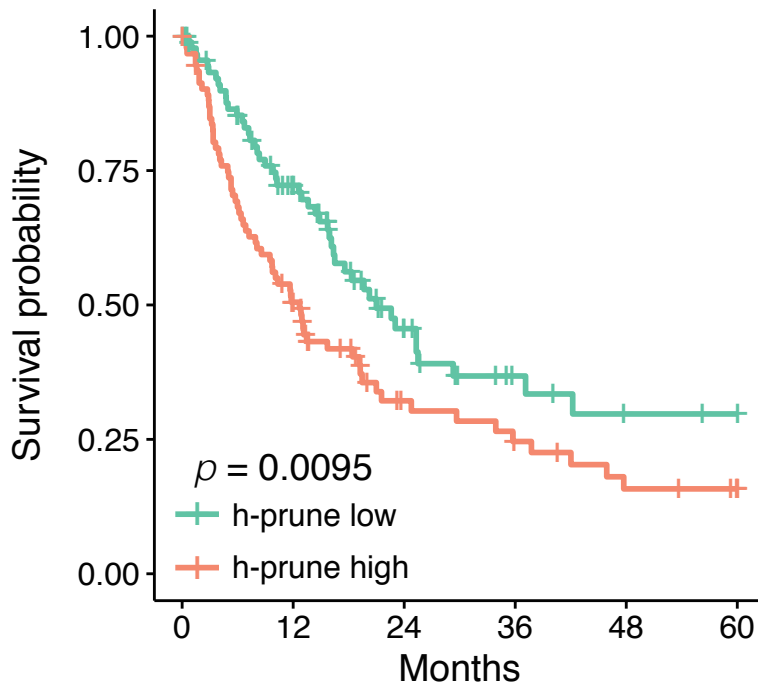

### Number at risk

| Strata       | 0  | 12 | 24 | 36 | 48 | 60 |
|--------------|----|----|----|----|----|----|
| h-prune low  | 93 | 56 | 22 | 11 | 7  | 6  |
| h-prune high | 93 | 43 | 17 | 12 | 7  | 4  |

Months
